# Supplementary material for: ABPP-HT - High-Throughput Activity-Based Profiling of Deubiquitylating Enzyme Inhibitors in a Cellular Context
Source: PubMed Central journal article supplement (PMC7947856; doi:10.3389/fchem.2021.640105), 2021-02-25
Supplement: image1.pdf [file image1.pdf]

**Figure S1**

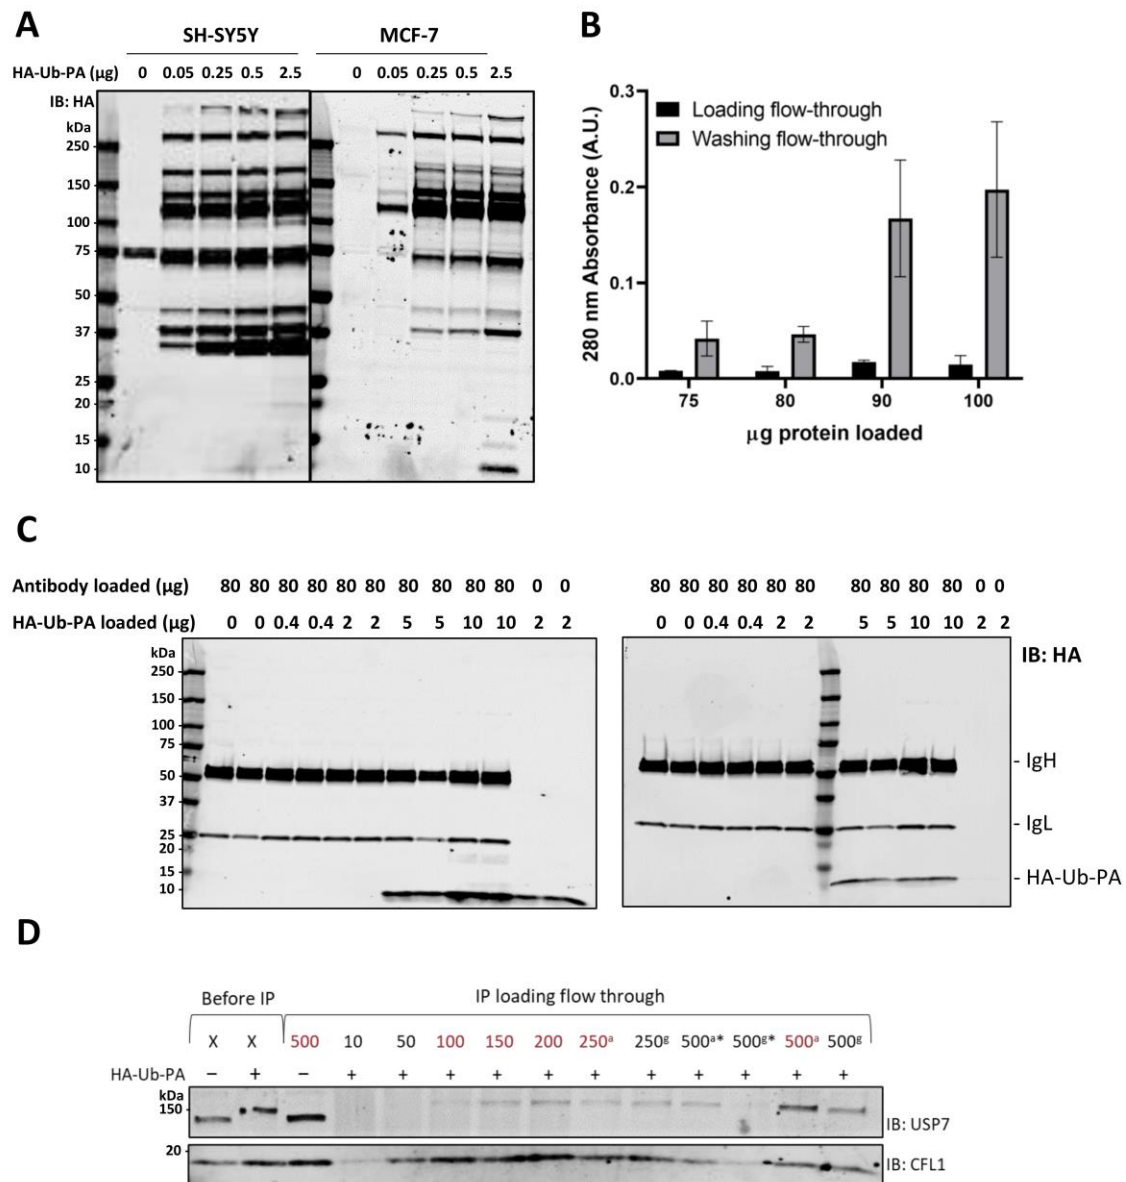

**Figure S1. Optimizing DUB target engagement in the ABPP-HT workflow** **A.** HA immunoblot of probe to lysate ratio optimisation, with 50  $\mu\text{g}$  of either SHSY5Y lysate or MCF-7 lysate incubated with increasing amounts of HA-Ub-PA at 37  $^{\circ}\text{C}$  for 45 minutes. **B.** Concentration dependence of unbound antibody detected with antibody loading onto protein A columns. **C.** Concentration dependence of unbound HA-Ub-PA probe detected with HA-542 Ub-PA loading onto protein G column with 80  $\mu\text{g}$  of antibody loaded. **D.** USP7 detected in IP flow-through where 100  $\mu\text{g}$  of HA antibody has been loaded. Values in red were used for quantitation in figure 2B. <sup>a</sup>protein A column, <sup>g</sup>protein G column, <sup>\*</sup>material was concentrated before loading to try to minimize loading time, the reduction in material is attributable to protein lost during the concentration step, not to increased HA-Ub-PA anti-HA binding. In each lane 5  $\mu\text{g}$  of protein was loaded except in the case of 10  $\mu\text{g}$  and 50  $\mu\text{g}$  where samples were too dilute to load 5  $\mu\text{g}$ .

## Figure S2

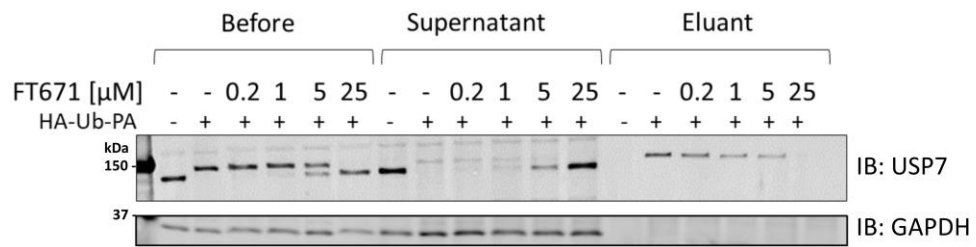

**Figure S2. Efficient immunoprecipitation of USP7 with ABPP-HT** USP7 immunoblot of FT671 concentration dependence. Before immunoprecipitation demonstrates probe labelling and inhibition, the supernatant and eluant bands show unlabelled and labelled bands respectively.

**Figure S3**

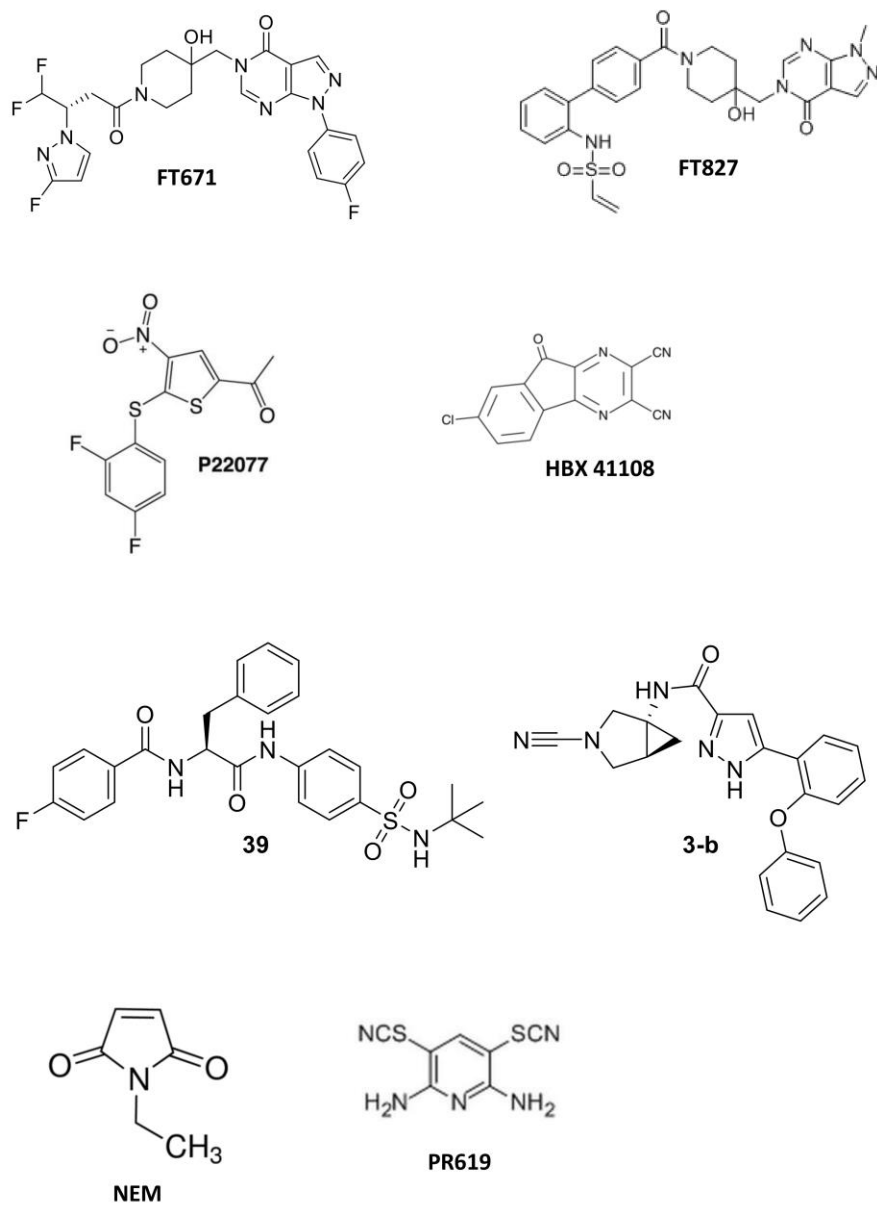

**Figure S3. DUB inhibitors used in this study.** USP7 inhibitors FT671 FT827, P22077, HBX 41108, USP30 inhibitor 39, USP30 inhibitor 3-b, and broad-spectrum cysteine modifiers NEM and PR619.

**Figure S4**

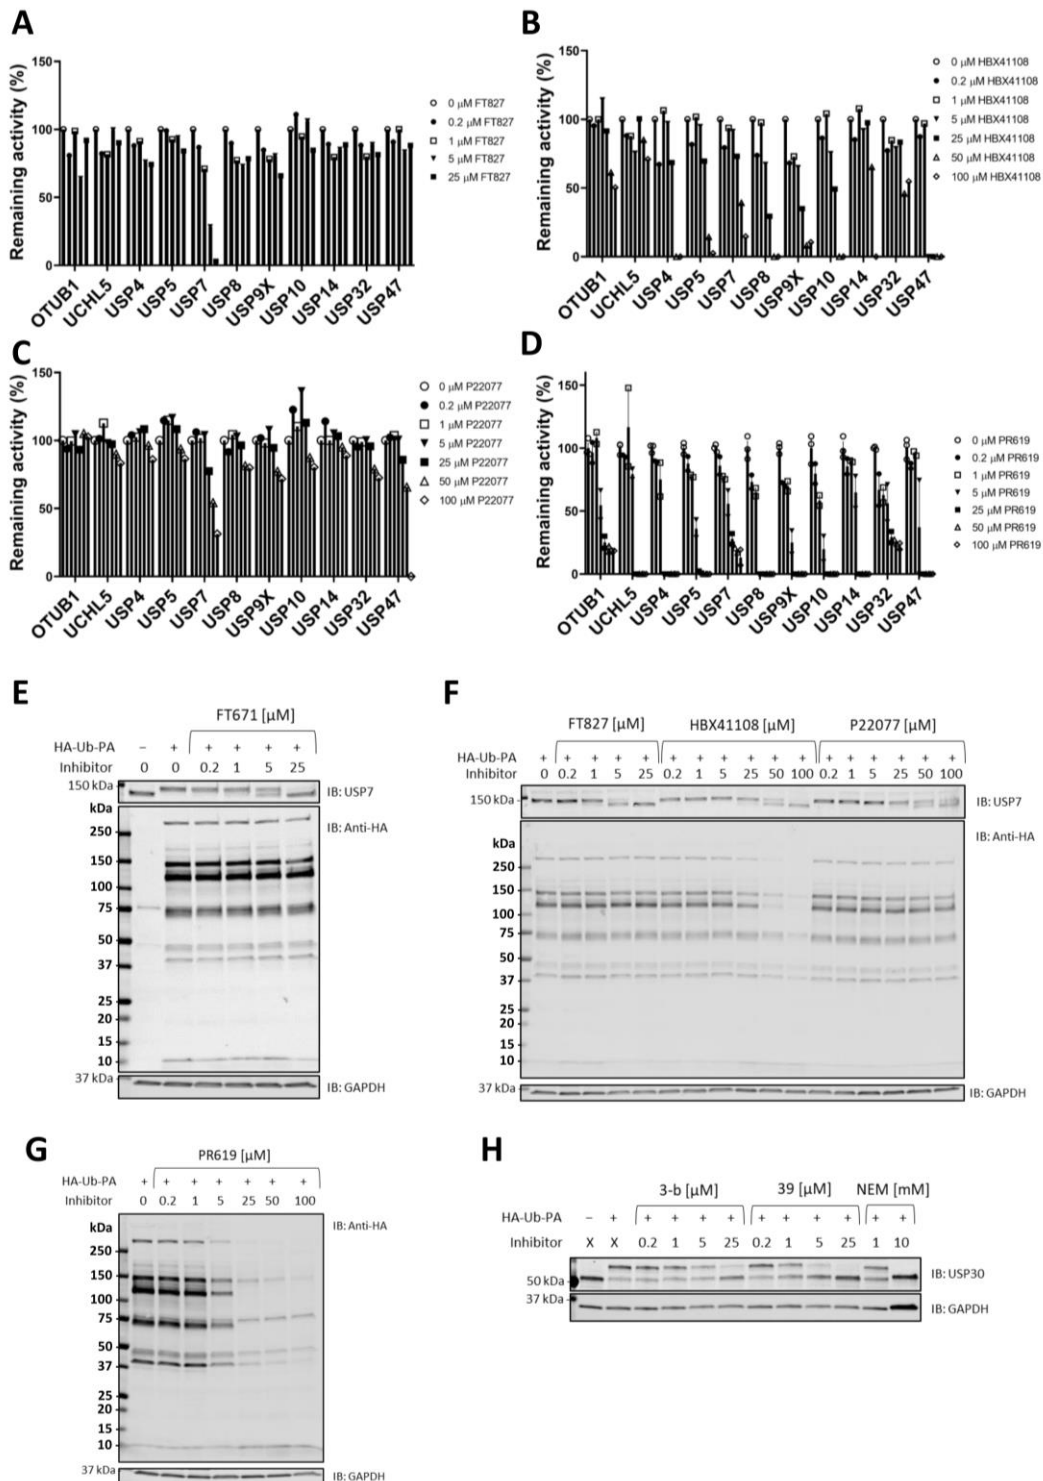

**Figure S4. Inhibitor cellular target engagement assessed by ABPP. A-D.** ABPP inhibition profile of a panel of DUBs by FT827, HBX41108, P22077, and PR609 (one experiment, except for PR609: SEM; n=2). **E.** USP7 and anti-HA immunoblot of specific USP7 inhibitor FT671. **F.** USP7 and anti-HA immunoblot of USP7 inhibitors FT827, HBX108 and P22077. **G.** Anti-HA immunoblot with broad-spectrum DUB inhibitor PR619. **H.** USP30 immunoblot of specific USP30 inhibitors 3-b and 39, and broad DUB inhibitor NEM in mouse brain lysates. GAPDH was used as loading control in these experiments.
